# Supplementary material for: A spiro-silafluorene–phenazasiline donor-based efficient blue thermally activated delayed fluorescence emitter and its host-dependent device characteristics
Source: Royal Society of Chemistry journal article supplement (doi:10.1039/c9tc00193j), 2019-01-01
Supplement: c9tc00193j1.pdf [file c9tc00193j1.pdf]

Supplementary Information for:

**Spiro-Silafluorene-Phenazasiline Donor based Efficient Blue Thermally Activated Delayed Fluorescence Emitter and its Host Dependent Device Characteristics**

*Seung-Je Woo,<sup>a</sup> Youheon Kim,<sup>b</sup> Yun-Hi Kim,<sup>\*,b</sup> Soon-Ki Kwon,<sup>\*,c</sup> and Jang-Joo Kim<sup>\*,a</sup>*

<sup>a</sup>Department of Materials Science and Engineering, Seoul National University, Seoul 151-742, South Korea

<sup>b</sup>Department of Chemistry and RIGET, Gyeongsang National University, Jinju 660-701, South Korea

<sup>c</sup>Department of Materials Engineering and Convergence Technology and ERI, Gyeongsang National University, Jinju 660-701, South Korea

Table of Contents:

1. Synthesis of the molecule
2. Supplementary Figures

## 1. Synthesis of the molecule

### 1.1. Materials

All reagents were purchased from Aldrich and TCI. Solvents were dried by using standard procedures. 2-Bromo-N-(2-bromophenyl)-N-(4-methoxybenzyl)aniline was synthesized by reported method. (Chemistry of Materials, 27, 6675-6681; 2015, DOI: 10.1021/acs.chemmater.5b02515)

### 1.2. Instruments

$^1\text{H}$ -NMR and  $^{13}\text{C}$ -NMR spectra were recorded on a Bruker 300 and Avance 500 spectrometer. A Jeol JMS-700 mass spectrometer was used to obtain the mass spectra of the samples.

### 1.3. Synthesis and Characterization

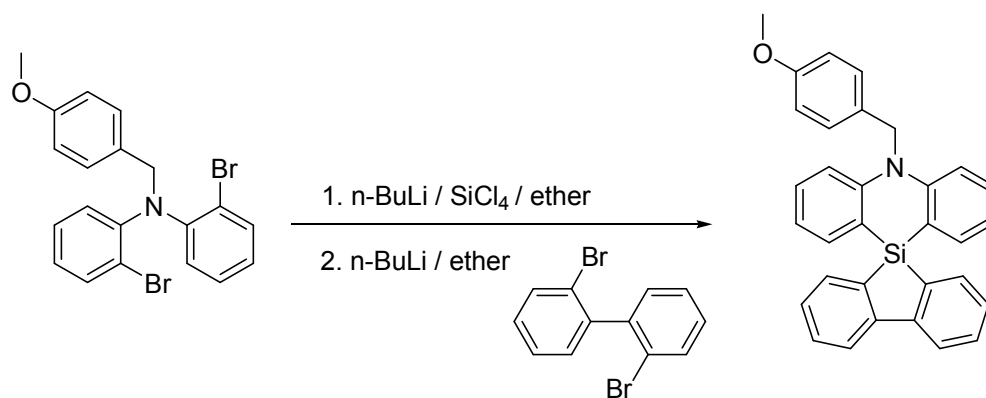

#### Synthesis of 5'-(4-methoxybenzyl)-5'H-spiro[dibenzo[b,d]silole-5,10'-dibenzo[b,e][1,4]azasiline].

2.5 M *n*-BuLi/hexane (6.22 mL, 15.54 mmol) was added to the mixture of 2-bromo-N-(2-bromophenyl)-N-(4-methoxybenzyl)aniline (3.16 g, 7.06 mmol) and 200 mL of ether at 0 °C. After the mixture was stirred for 30 min at 0 °C, the solution of tetrachlorosilane (0.81 mL, 7.06 mmol) was added to the mixture. The solution was stirred for 4 h at room temperature.

And then 2.5 M *n*-BuLi/hexane (6.22 mL, 15.55 mmol) was added to the mixture of 2,2'-dibromo-1,1'-biphenyl (2.2 g, 7.06 mmol) and 20 mL of ether at -78 °C in another flask. After the mixture was stirred for 1 h at -78 °C, this mixture was transferred to the first reaction flask. The solution was extracted by using water and ether. The ether layer was dried by MgSO<sub>4</sub>, and ether was evaporated. The crude product

was purified by recrystallization using dichloromethane /hexane (1/4). Yield: 2.24 g (67.91 %),

$^1\text{H-NMR}$  (300 MHz,  $\text{CDCl}_3$ )  $\delta$  = 7.96-7.93 (d, 2H), 7.57-7.49 (m, 4H), 7.35-7.30 (m, 4H), 7.26-7.22 (m, 4H), 7.10-7.08 (d, 2H), 6.99-6.96 (d, 2H), 6.88-6.83 (t, 2H), 5.36 (s, 2H), 3.82 (s, 3H).

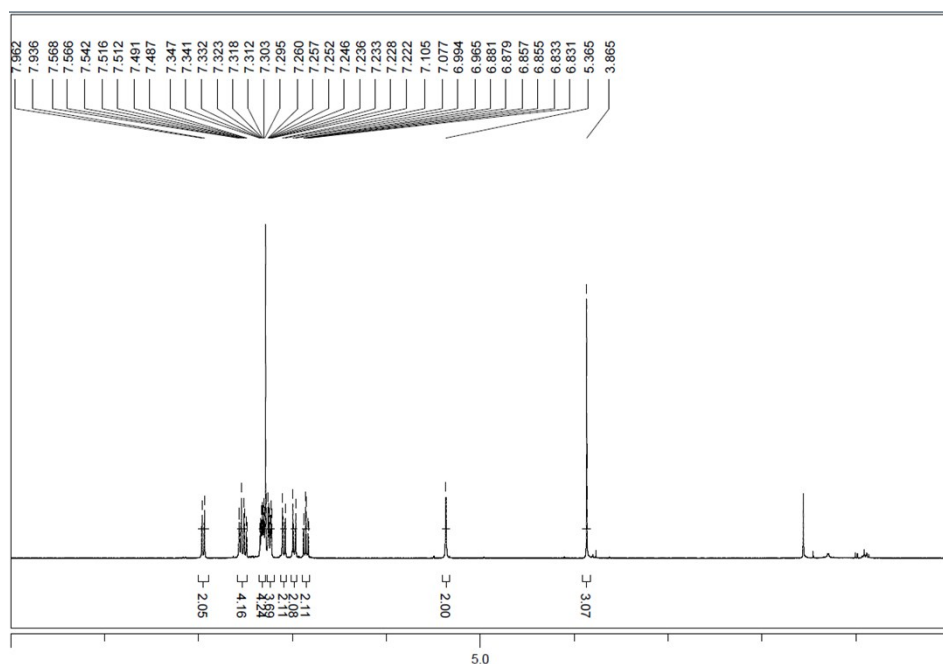

Synthesis Figure 1.  $^1\text{H-NMR}$  Spectra of 5'-(4-methoxybenzyl)-5'H-spiro[dibenzo[b,d]silole-5,10'-dibenzo[b,e][1,4]azasiline].



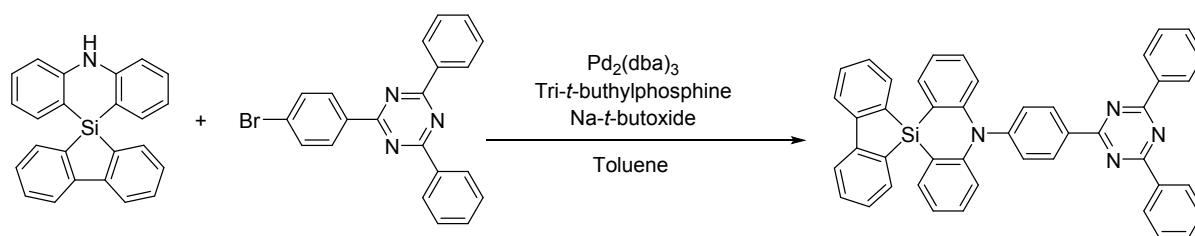

**Synthesis of 5'-(4-(4,6-diphenyl-1,3,5-triazin-2-yl)-2-methylphenyl)-5'H-spiro[dibenzo[b,d]silole-5,10'-dibenzo[b,e][1,4]azasiline].**

5'H-spiro[dibenzo[b,d]silole-5,10'-dibenzo[b,e][1,4]azasiline] (0.4 g, 1.15 mmol) and 2-(4-bromo-3-methylphenyl)-4,6-diphenyl-1,3,5-triazine (0.45 g, 1.15 mmol) were mixed in dry toluene (5.75 mL). Na-*t*-butoxide (0.33 g, 3.45 mmol), tri-*t*-butylphosphine (0.02 g, 0.115 mmol) and tris(dibenzylideneacetone)dipalladium(0) (0.05 g, 0.058 mmol) was added and stirred for 10 h at 90 °C. The reaction mixture was extracted with dichloromethane and dried over anhydrous MgSO<sub>4</sub>. The product was purified by a column with hexane and dichloromethane (Hex : MC = 3:1). Yield : 0.47 g, (62.35 %) <sup>1</sup>H-NMR (300 MHz, CD<sub>2</sub>Cl<sub>2</sub>) δ = 9.17-9.14 (d, 2H), 8.90-8.87 (m, 4H), 8.03-8.01 (d, 2H), 7.72-7.64 (m, 8H), 7.62-7.54 (m, 4H), 7.35-7.30 (t, 2H), 7.28-7.22 (m, 4H), 6.88-6.83 (t, 2H), 6.67-6.64 (d, 2H). <sup>13</sup>C-NMR (500 MHz, CDCl<sub>3</sub>) δ = 171.93, 171.08, 150.55, 148.76, 147.57, 137.62, 136.09, 136.05, 135.84, 134.58, 132.76, 131.90, 131.15, 131.08, 131.05, 129.06, 128.77, 127.97, 120.83, 120.10, 117.78, 113.85. HRMS (EI) *m/z* C<sub>45</sub>H<sub>30</sub>N<sub>4</sub>Si Calcd: 654.2240, Found: 654.2238 (M<sup>+</sup>, 100%).

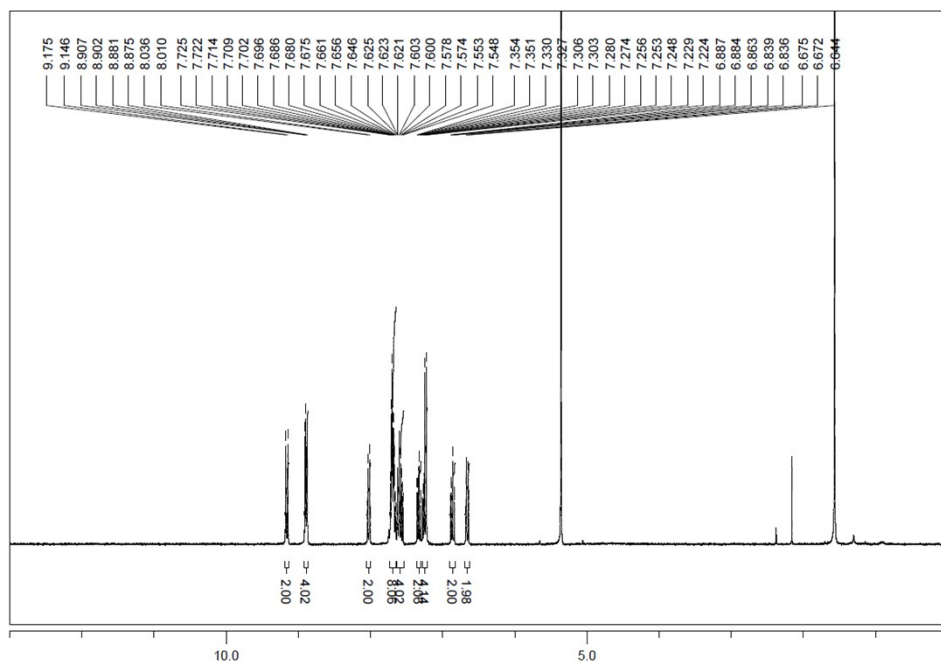

Synthesis Figure 3. <sup>1</sup>H-NMR Spectra of 5'-(4-(4,6-diphenyl-1,3,5-triazin-2-yl)-2-methylphenyl)-5'H-spiro[dibenzo[b,d]silole-5,10'-dibenzo[b,e][1,4]azasiline].

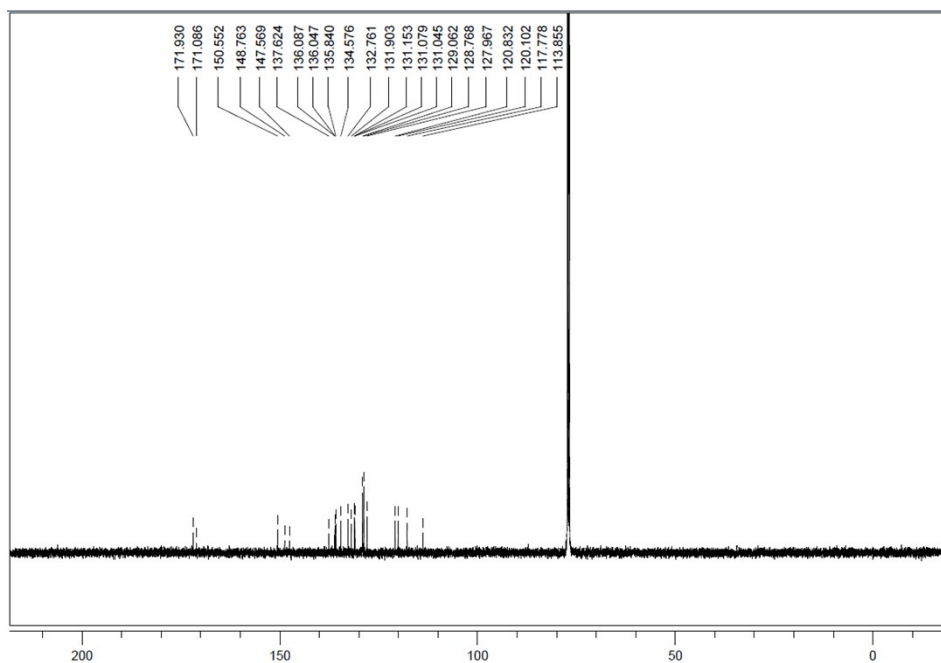

Synthesis Figure 4. <sup>13</sup>C-NMR Spectra of 5'-(4-(4,6-diphenyl-1,3,5-triazin-2-yl)-2-methylphenyl)-5'H-spiro[dibenzo[b,d]silole-5,10'-dibenzo[b,e][1,4]azasiline].

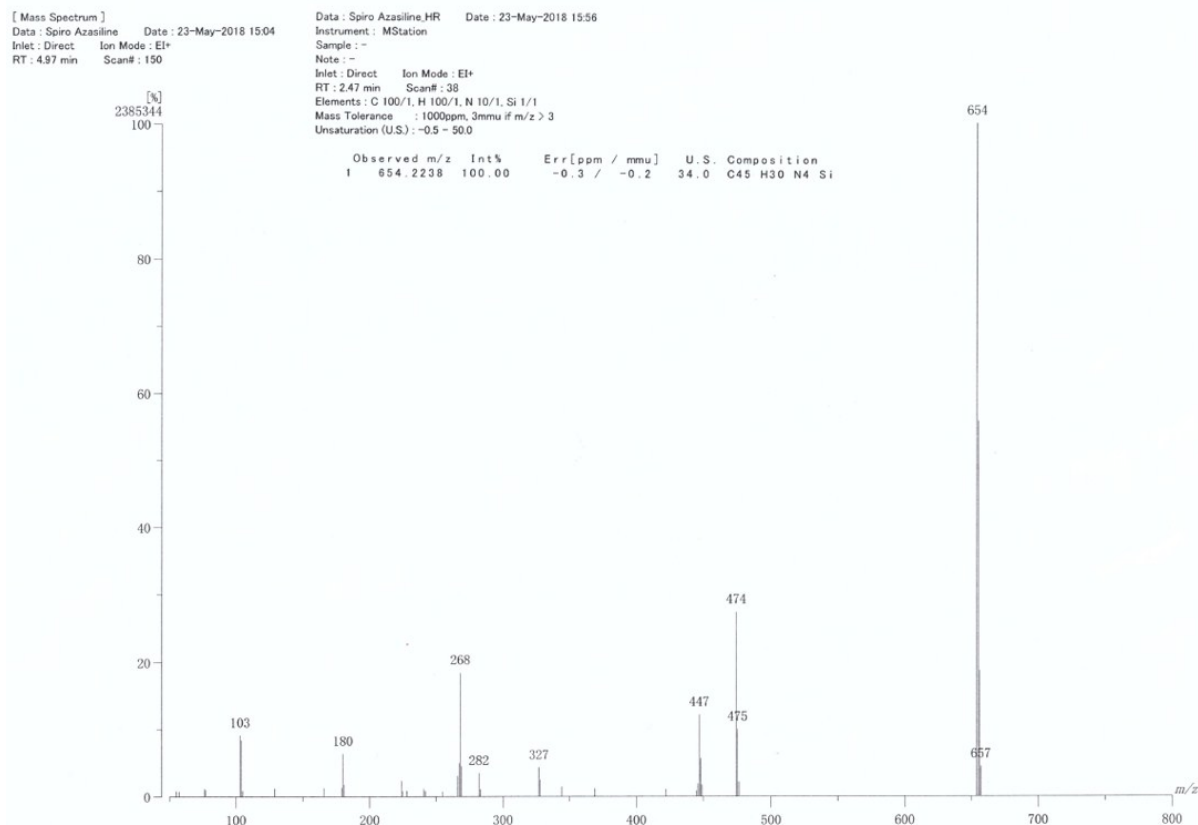

Synthesis Figure 5. EI Mass Spectra of 5'-(4-(4,6-diphenyl-1,3,5-triazin-2-yl)-2-methylphenyl)-5'H-spiro[dibenzo[b,d]silole-5,10'-dibenzo[b,e][1,4]azasiline].

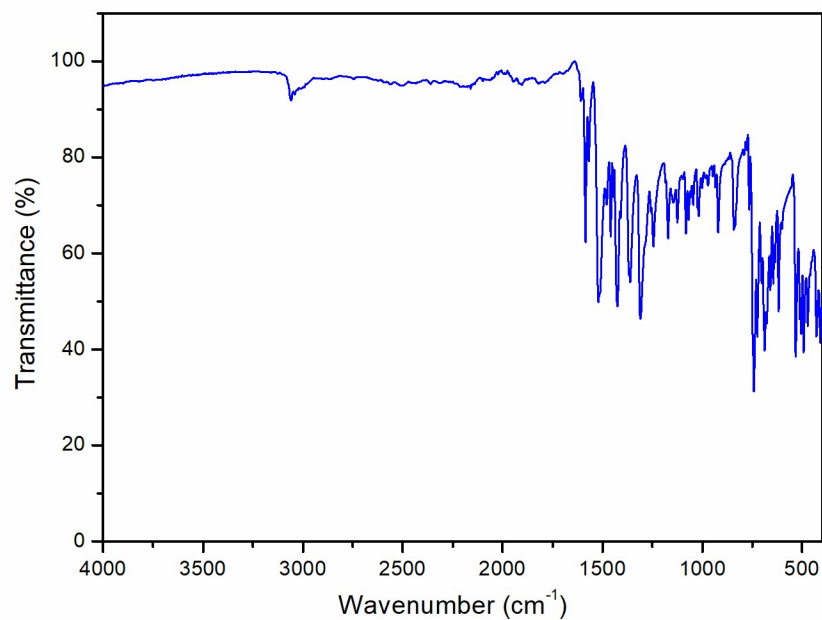

Synthesis Figure 6. FT-IR spectrum of SAzTrz.

Synthesis Table 1. Element Analysis of SAzTrz

|          | <b>Sample(mg)</b> | <b>Nitrogen(%)</b> | <b>Carbon(%)</b> | <b>Hydrogen(%)</b> | <b>Sulfur(%)</b> |
|----------|-------------------|--------------------|------------------|--------------------|------------------|
| Sample 1 | 2.149             | 8.1569             | 82.494           | 4.5425             | N.D              |
| Sample 2 | 2.361             | 8.2224             | 82.595           | 4.4755             | N.D              |
| Sample 3 | 2.512             | 8.1621             | 81.943           | 4.4407             | N.D              |



## 2. Supplementary Table and Figures

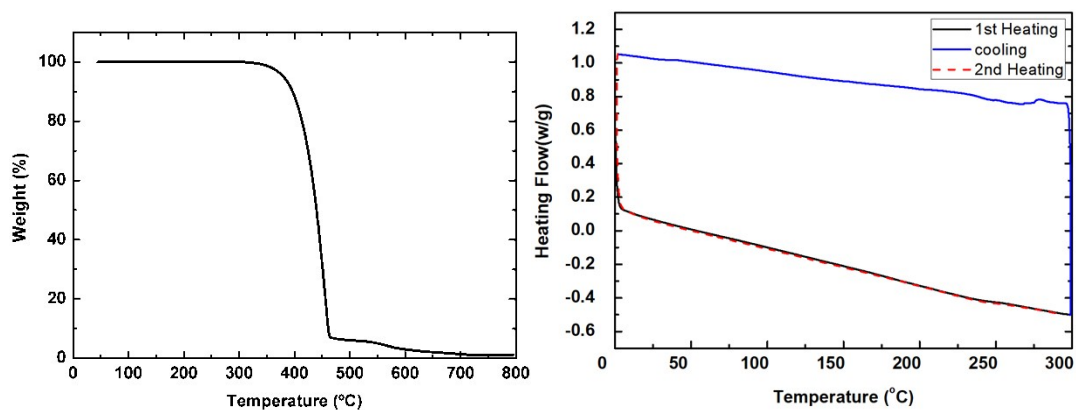

**Figure S1.** Thermogravimetric analysis (TGA) and differential scanning calorimetry (DSC) of SAzTrz.

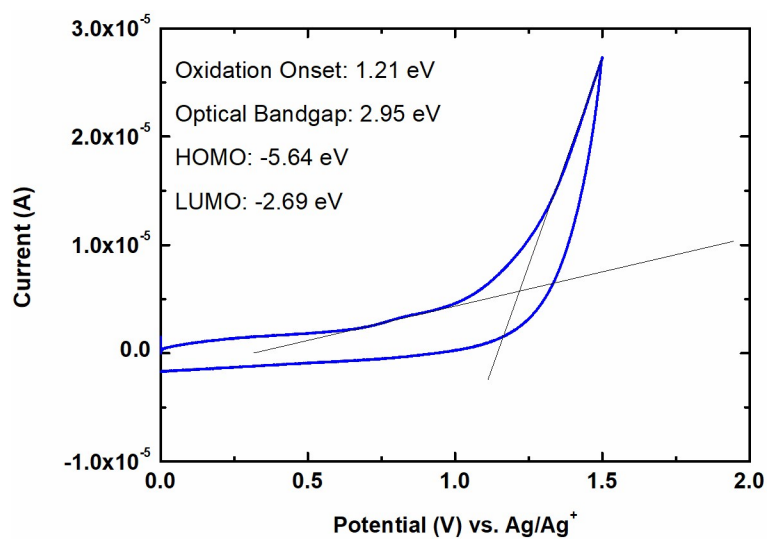

**Figure S2.** Cyclic Voltammetry curve of SAzTrz.

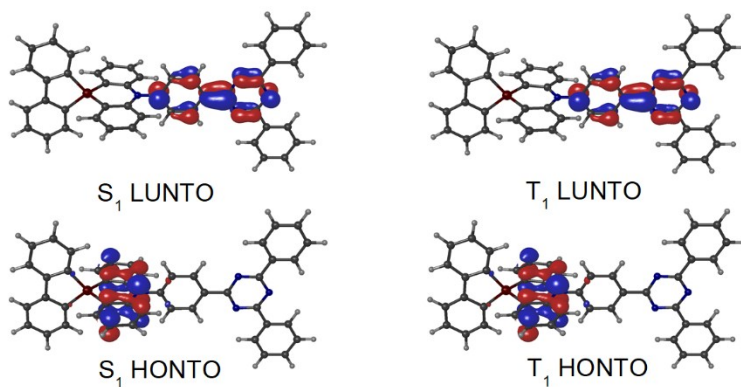

**Figure S3.** Optimized  $S_1$  state geometry and natural transition orbitals of  $S_1 \rightarrow S_0$  and  $T_1 \rightarrow S_0$  of SAzTrz.

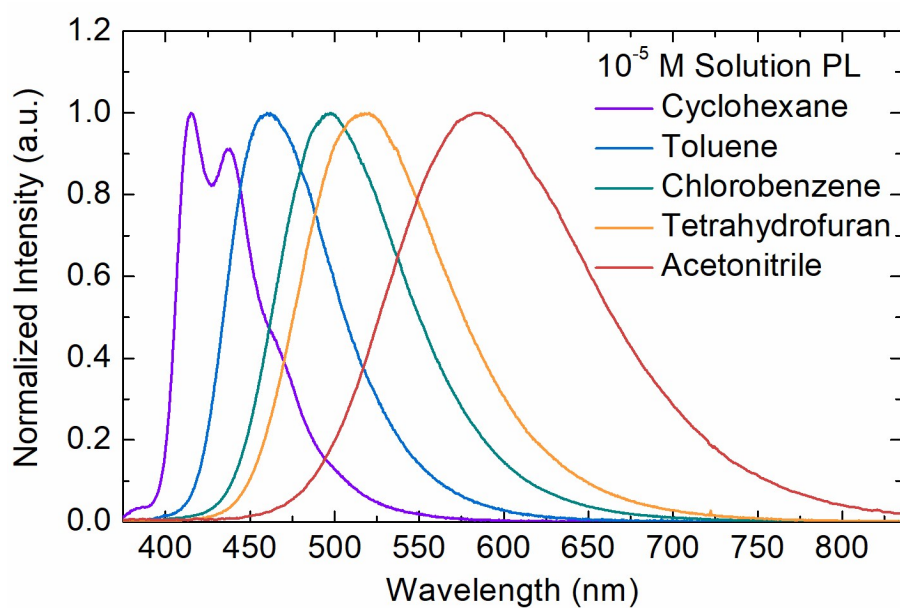

**Figure S4.** Solvatochromism of SAzTrz.

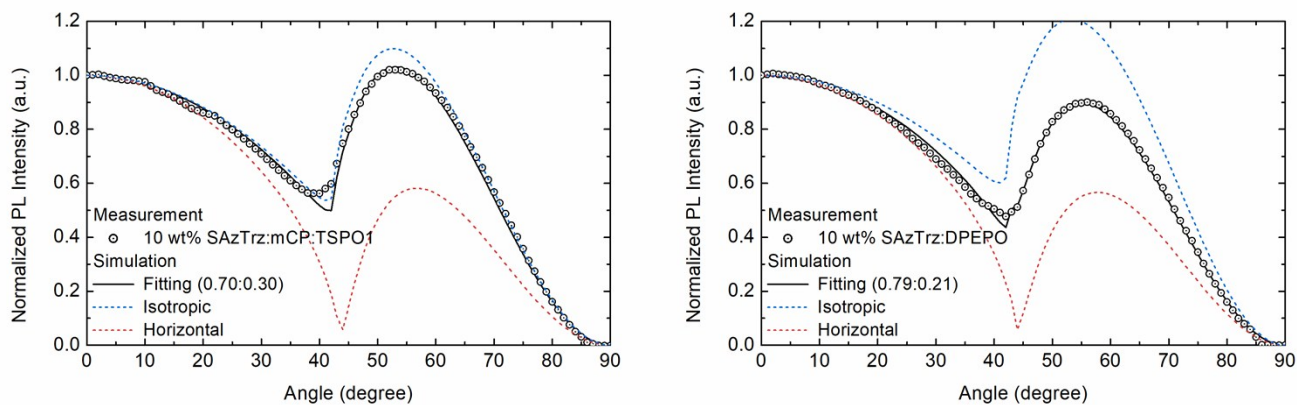

**Figure S5.** Angle-Dependent PL intensity of p-polarized light from 10 wt% SAzTrz: mCP:TSPO1 and 12 wt% SAzTrz:DPEPO 30 nm films at the wavelength of PL peak of each film.

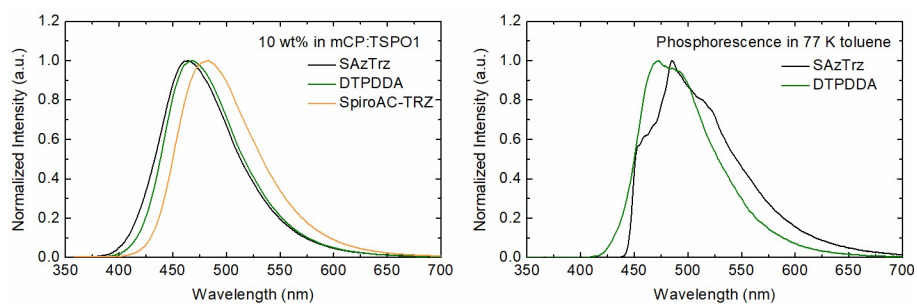

**Figure S6.** PL spectra of SAzTrz, DTPDDA, and SpiroAC-TRZ in 10 wt% mCP:TSPO1 film and phosphorescence of SAzTrz and DTPDDA in 77 K toluene.

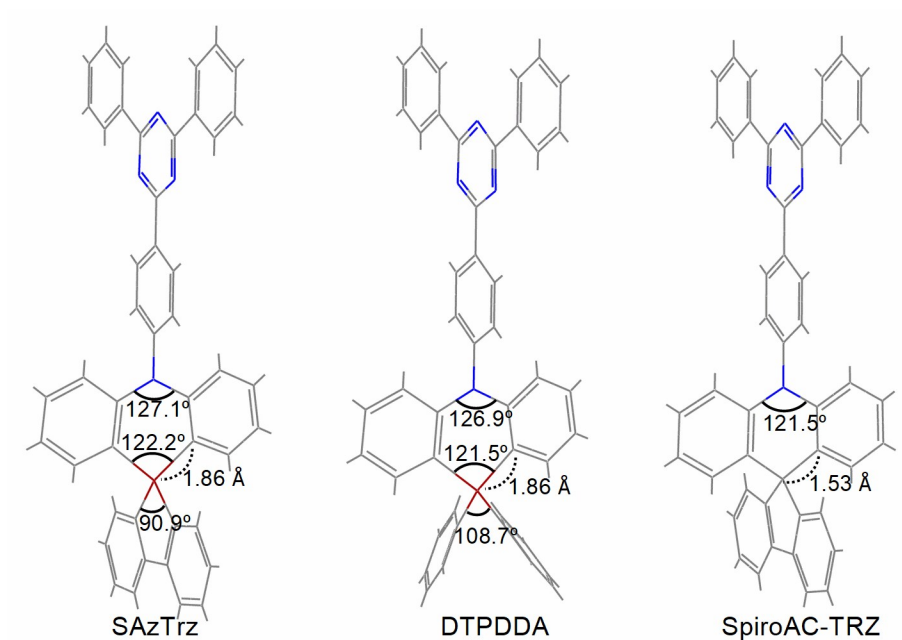

**Figure S7.** Bond angles and length of SAzTrz, DTPDDA, and SpiroAC-TRZ at optimized  $S_0$  geometry.

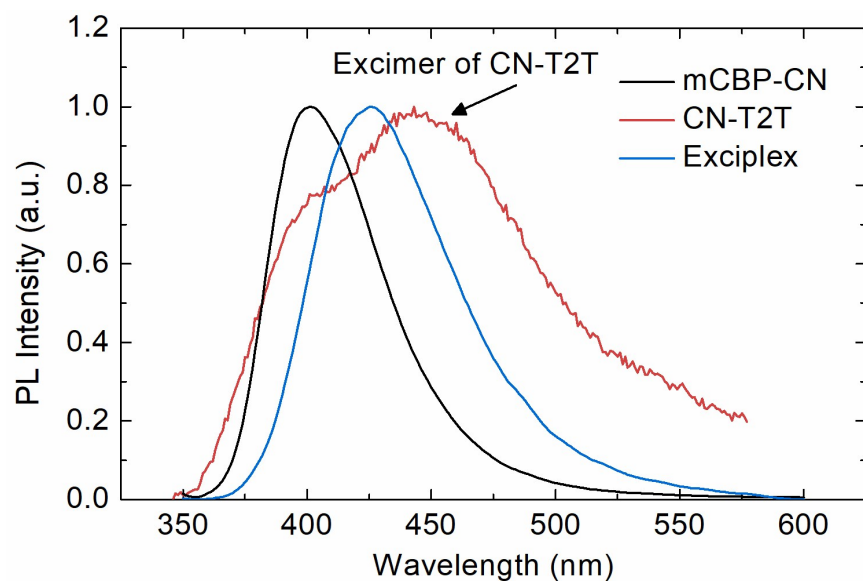

**Figure S8.** PL spectra of mCBP-CN, CN-T2T, and the exciplex.

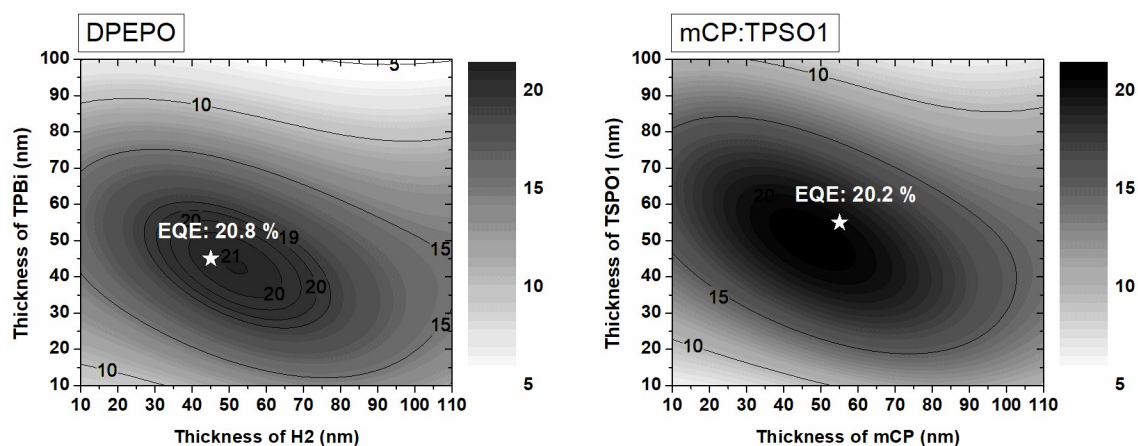

**Figure S9.** EQE simulation of DPEPO and mCP:TPSO1 host device.

**Table S1.** Photophysical properties of SAzTrz, DTPDDA, and SpiroAC-TRZ. ( $10^{-5}$  M toluene solution for a and 10 wt% in mCP:TSPO1 film for b-g)

| Material    | Peak <sub>sol</sub> <sup>a</sup><br>(nm) | Peak <sub>film</sub> <sup>b</sup><br>(nm) | $\Delta E_{ST}$ <sup>c</sup><br>(eV) | PLQY <sup>d</sup><br>(%) | $\Phi_p$ <sup>e</sup><br>(%) | $\Phi_d$ <sup>f</sup><br>(%) | $\Theta$ <sup>g</sup><br>(%) |
|-------------|------------------------------------------|-------------------------------------------|--------------------------------------|--------------------------|------------------------------|------------------------------|------------------------------|
| SAzTrz      | 458                                      | 465                                       | 0.25                                 | 65                       | 11                           | 89                           | 70                           |
| DTPDDA      | 465                                      | 468                                       | 0.16                                 | 70                       | 19                           | 81                           | 66                           |
| SpiroAC-TRZ | 486                                      | 483                                       | 0.07                                 | 98                       | 20                           | 80                           | 71                           |

**Table S2.** EL device characteristics of SAzTrz, DTPDDA, and SpiroAC-TRZ. <sup>a</sup>maximum EQE of real device. <sup>b</sup>Calculated maximum EQE by optical simulation based on PLQY and  $\Theta$  of the emitters. <sup>c</sup>Estimated RISC efficiency. <sup>d</sup>PL quantum yield. <sup>e</sup>Horizontal ratio of emitting dipole orientation.

| Material                 | Host      | EQE <sub>max</sub> <sup>a</sup><br>(nm) | EQE <sub>max,cal</sub> <sup>b</sup><br>(nm) | $\Phi_{RISC}$ <sup>c</sup> (%) | PLQY <sup>d</sup><br>(%) | $\Theta$ <sup>e</sup> (%) |
|--------------------------|-----------|-----------------------------------------|---------------------------------------------|--------------------------------|--------------------------|---------------------------|
| SAzTrz                   | DPEPO     | 20.6                                    | 20.8                                        | ~100                           | 68                       | 79                        |
| SAzTrz                   | mCP:TSPO1 | 8.2                                     | 20.2                                        | ~20                            | 65                       | 70                        |
| DTPDDA <sup>43</sup>     | mCP:TSPO1 | 22.3                                    | 22.0                                        | ~100                           | 70                       | 66                        |
| SpiroAC-TRZ <sup>8</sup> | mCP-CN    | 36.7                                    | 38.3                                        | ~100                           | 100                      | 83                        |
